# Supplementary material for: Designed gramicidin-inspired stabilized peptide-based therapeutics to potentiate immunotherapy against aggressive kidney cancer
Source: Royal Society of Chemistry journal article supplement (doi:10.1039/d5bm00109a), 2025-01-01
Supplement: d5bm00109a7.pdf [file d5bm00109a7.pdf]

**MOV1** - Video illustrating the changes in APL for the last 40 ns of simulation for LD8Δ system. (Please note that LD8 parallel system in the video refers to LD8Δ in parallel orientation to the membrane)

**MOV2** - Video illustrating the changes in membrane thickness for the last 40 ns of simulation for LD8Δ system. (Please note that LD8 parallel system in the video refers to LD8Δ in parallel orientation to the membrane)

**MOV3** - Video illustrating the changes in mean curvature for the last 40 ns of simulation for LD8Δ system. (Please note that LD8 parallel system in the video refers to LD8Δ in parallel orientation to the membrane)

**MOV4** - Video illustrating the changes in APL for the last 40 ns of simulation for Melittin system. (Please note that Melittin system in the video refers to melittin in parallel orientation to the membrane)

**MOV5** - Video illustrating the changes in membrane thickness for the last 40 ns of simulation for Melittin system. (Please note that Melittin system in the video refers to melittin in parallel orientation to the membrane)

**MOV6** - Video illustrating the changes in mean curvature for the last 40 ns of simulation for Melittin system. (Please note that Melittin system in the video refers to melittin in parallel orientation to the membrane)
